# Supplementary material for: Evaluation of LiNES: A New Measure of Trauma, Negative Affect, and Relationship Insecurity Over the Life Span in Persons With FND
Source: Atypon-hosted journal article supplement (doi:10.1176/appi.neuropsych.19050121), 2019-12-23
Supplement: appi.neuropsych.19050121.ds001.pdf [file appi.neuropsych.19050121.ds001.pdf]

## Supplementary Information: LINES with scoring grid

|                                                                                                                                                                                                                                                                                                                                                                                                                    |                   |   |   |             |   |   |              |                        |
|--------------------------------------------------------------------------------------------------------------------------------------------------------------------------------------------------------------------------------------------------------------------------------------------------------------------------------------------------------------------------------------------------------------------|-------------------|---|---|-------------|---|---|--------------|------------------------|
| <p><b>Instructions:</b> In each of the following sections, you will be asked to rate how often you had some particular experiences and had certain feelings. You will be asked to rate the same items several times, in order to find out about your experiences during three different stages of your life (childhood, adolescence, and adulthood). Please complete by placing a cross in the appropriate box</p> |                   |   |   |             |   |   |              |                        |
| <b>Part A: In your * to what degree did you experience...?</b>                                                                                                                                                                                                                                                                                                                                                     |                   |   |   |             |   |   |              |                        |
|                                                                                                                                                                                                                                                                                                                                                                                                                    | <b>Not at all</b> |   |   | <b>Some</b> |   |   | <b>A lot</b> |                        |
|                                                                                                                                                                                                                                                                                                                                                                                                                    | 0                 | 1 | 2 | 3           | 4 | 5 | 6            | <b>Scoring</b>         |
| Physical neglect                                                                                                                                                                                                                                                                                                                                                                                                   |                   |   |   |             |   |   |              |                        |
| Physical abuse                                                                                                                                                                                                                                                                                                                                                                                                     |                   |   |   |             |   |   |              |                        |
| Emotional abuse                                                                                                                                                                                                                                                                                                                                                                                                    |                   |   |   |             |   |   |              |                        |
| Sexual abuse                                                                                                                                                                                                                                                                                                                                                                                                       |                   |   |   |             |   |   |              |                        |
| Average (if at least 3 items completed)                                                                                                                                                                                                                                                                                                                                                                            |                   |   |   |             |   |   |              | <b>A</b>               |
| <b>Part B: In your * to what extent did you feel...?</b>                                                                                                                                                                                                                                                                                                                                                           |                   |   |   |             |   |   |              |                        |
|                                                                                                                                                                                                                                                                                                                                                                                                                    | <b>Not at all</b> |   |   | <b>Some</b> |   |   | <b>A lot</b> |                        |
|                                                                                                                                                                                                                                                                                                                                                                                                                    | 0                 | 1 | 2 | 3           | 4 | 5 | 6            | <b>Scoring</b>         |
| Angry                                                                                                                                                                                                                                                                                                                                                                                                              |                   |   |   |             |   |   |              |                        |
| Afraid                                                                                                                                                                                                                                                                                                                                                                                                             |                   |   |   |             |   |   |              |                        |
| Stressed                                                                                                                                                                                                                                                                                                                                                                                                           |                   |   |   |             |   |   |              |                        |
| Worried                                                                                                                                                                                                                                                                                                                                                                                                            |                   |   |   |             |   |   |              |                        |
| Anxious                                                                                                                                                                                                                                                                                                                                                                                                            |                   |   |   |             |   |   |              |                        |
| Average (if at least 3 items completed)                                                                                                                                                                                                                                                                                                                                                                            |                   |   |   |             |   |   |              | <b>B</b>               |
| <b>Part C: In your * to what extent did you feel...?</b>                                                                                                                                                                                                                                                                                                                                                           |                   |   |   |             |   |   |              |                        |
|                                                                                                                                                                                                                                                                                                                                                                                                                    | <b>Not at all</b> |   |   | <b>Some</b> |   |   | <b>A lot</b> |                        |
|                                                                                                                                                                                                                                                                                                                                                                                                                    | 0                 | 1 | 2 | 3           | 4 | 5 | 6            | <b>Reverse Scoring</b> |
| Secure                                                                                                                                                                                                                                                                                                                                                                                                             |                   |   |   |             |   |   |              |                        |
| Loved                                                                                                                                                                                                                                                                                                                                                                                                              |                   |   |   |             |   |   |              |                        |
| Confident                                                                                                                                                                                                                                                                                                                                                                                                          |                   |   |   |             |   |   |              |                        |
| Supported                                                                                                                                                                                                                                                                                                                                                                                                          |                   |   |   |             |   |   |              |                        |
| Average (if at least 3 items completed)                                                                                                                                                                                                                                                                                                                                                                            |                   |   |   |             |   |   |              | <b>C</b>               |

\* This will be filled in for three different developmental categories – childhood, adolescence, and adulthood. **Scoring:** Part C. Reverse scoring: All four items in Part C, are reverse scored. Therefore, the score for each item is calculated by subtracting the score from 6; Missing data: If more than one item per subscale is missing, average scores should not be calculated.

**Supplementary Table S1. PANAS, CATS, RSQ and SDQ scores<sup>a</sup>**

|                      | FND    |           | Control |           | Stats            |                |
|----------------------|--------|-----------|---------|-----------|------------------|----------------|
|                      | Median | Range     | Median  | Range     | Mann-Whitney (Z) | p              |
| <b>PANAS</b>         |        |           |         |           |                  |                |
| Positive             | 2      | 11-50     | 33      | 15-48     | 4.08             | < <b>0.001</b> |
| Negative             | 22.5   | 10-48     | 17      | 10-41     | 3.91             | < <b>0.001</b> |
| <b>CATS</b>          |        |           |         |           |                  |                |
| Negative environment | 1      | 0-3.31    | 0.5     | 0-2.5     | 4.57             | < <b>0.001</b> |
| Punishment           | 1.33   | 0-3.83    | 1.16    | 0-2.83    | 2.43             | <b>0.015</b>   |
| Sexual abuse         | 0      | 0-3.85    | 0       | 0-1.67    | 6.05             | < <b>0.001</b> |
| Emotional abuse      | 1      | 0-3.85    | 0.71    | 0-3.14    | 3.71             | < <b>0.001</b> |
| Total score          | .080   | 0.11-3.05 | .53     | 0.05-1.82 | 4.30             | < <b>0.001</b> |
| <b>RSQ</b>           |        |           |         |           |                  |                |
| Anxious              | 2.61   | 1-4.84    | 2.00    | 1-4.6     | 3.96             | < <b>0.001</b> |
| Avoidant             | 3.00   | 1.8-4.3   | 2.62    | 1.62-4.12 | 4.94             | < <b>0.001</b> |
| <b>SDQ</b>           |        |           |         |           |                  |                |
|                      | 39.5   | 12-76     | 21.0    | 20-46     | 9.76             | < <b>0.001</b> |

<sup>a</sup> PANAS, Positive and Negative Affect Scale (FND n = 70; Control n = 167); CATS, Childhood Abuse and Trauma Scale (FND n = 70; Control n = 167); RSQ, Relationship Scales Questionnaire (FND n = 70; Control n = 170).; SDQ, Somatoform Dissociation Questionnaire (FND n = 70; Control n = 96). p in bold, significant after Bonferroni-Holm correction.

**Supplementary Table S2. Internal consistency<sup>a</sup>**

| <b>LiNES subscales</b>  |                                |                                    |
|-------------------------|--------------------------------|------------------------------------|
| <b>Childhood</b>        | <b>FND <math>\alpha</math></b> | <b>Control <math>\alpha</math></b> |
| Interpersonal trauma    | 0.81                           | 0.62                               |
| Negative affect         | 0.95                           | 0.85                               |
| Relationship insecurity | 0.90                           | 0.82                               |
| <b>Adolescence</b>      | <b>FND <math>\alpha</math></b> | <b>Control <math>\alpha</math></b> |
| Interpersonal trauma    | 0.78                           | 0.64                               |
| Negative affect         | 0.96                           | 0.86                               |
| Relationship insecurity | 0.92                           | 0.80                               |
| <b>Adulthood</b>        | <b>FND <math>\alpha</math></b> | <b>Control <math>\alpha</math></b> |
| Interpersonal trauma    | 0.87                           | 0.52                               |
| Negative affect         | 0.94                           | 0.87                               |
| Relationship insecurity | 0.87                           | 0.76                               |

<sup>a</sup>  $\alpha$ , Cronbach's alpha

**Supplementary Table S3. LiNES scores<sup>a</sup>**

| LiNES subscales    | FND n = 71 |        | Control n = 170 |        | Mann-Whitney (Z) | p                |
|--------------------|------------|--------|-----------------|--------|------------------|------------------|
|                    | Median     | range  | Median          | range  |                  |                  |
| <b>Childhood</b>   |            |        |                 |        |                  |                  |
| Trauma             | 0.50       | 0-4.75 | 0.00            | 0-2.75 | 6.79             | <b>&lt;0.001</b> |
| Affect             | 2.00       | 0-6    | 1.40            | 0-5.6  | 2.41             | <b>0.016</b>     |
| Relationship       | 5.25       | 0-6    | 1.25            | 0-5.25 | 2.69             | 0.07             |
| <b>Adolescence</b> |            |        |                 |        |                  |                  |
| Trauma             | 0.75       | 0-4.5  | 0.00            | 0-3.5  | 7.48             | <b>&lt;0.001</b> |
| Affect             | 3.00       | 0-6    | 2.40            | 0-6    | 1.82             | 0.067            |
| Relationship       | 2.50       | 0-6    | 1.50            | 0-5.5  | 2.84             | <b>0.004</b>     |
| <b>Adulthood</b>   |            |        |                 |        |                  |                  |
| Trauma             | 0.75       | 0-6    | 0.00            | 0-2    | 7.34             | <b>&lt;0.001</b> |
| Affect             | 4.20       | 0-6    | 2.40            | 0-5.4  | 5.07             | <b>&lt;0.001</b> |
| Relationship       | 2.00       | 0-5.25 | 1.50            | 0-4.5  | 2.89             | <b>0.004</b>     |

<sup>a</sup>Trauma, LiNES Interpersonal trauma subscale; Affect, LiNES Negative affect subscale; Relationship, LiNES Relationship insecurity subscale; p in bold, significant after Bonferroni-Holm correction.

**Supplementary Table S4.** LiNES scores in FND and NEAD&FND individuals<sup>a</sup>

| LiNES subscales    | FND n = 36 |        | NEAD&FND n = 35 |        | Mann-Whitney (Z) | p            |
|--------------------|------------|--------|-----------------|--------|------------------|--------------|
|                    | Median     | range  | Median          | range  |                  |              |
| <b>Childhood</b>   |            |        |                 |        |                  |              |
| Trauma             | 0.00       | 0-4.5  | 1.5             | 0-4.75 | 2.91             | <b>0.004</b> |
| Affect             | 1.50       | 0-5.6  | 3               | 0-6    | 1.58             | 0.114        |
| Relationship       | 1.25       | 0-5.6  | 3               | 0-6    | 1.62             | 0.104        |
| <b>Adolescence</b> |            |        |                 |        |                  |              |
| Trauma             | 0.25       | 0-4.5  | 1.5             | 0-4.5  | 2.81             | <b>0.005</b> |
| Affect             | 2.1        | 0-6    | 3.4             | 0-6    | 2.30             | 0.021        |
| Relationship       | 1.75       | 0-6    | 3               | 0-6    | 1.92             | 0.054        |
| <b>Adulthood</b>   |            |        |                 |        |                  |              |
| Trauma             | 0.12       | 0-5.25 | 1.25            | 0-6    | 1.95             | 0.051        |
| Affect             | 2.8        | 0-6    | 4.6             | 0-6    | 2.61             | <b>0.009</b> |
| Relationship       | 1.5        | 0-5.25 | 2.25            | 0-5    | 2.28             | <b>0.022</b> |

<sup>a</sup> Trauma, LiNES Interpersonal trauma subscale; Affect, LiNES Negative affect subscale; Relationship, LiNES Relationship insecurity subscale; p in bold, significant after Bonferroni-Holm correction.

**Supplementary Table S5A. FND participants - Relationships between childhood, adolescence, and adulthood LiNES scores<sup>a</sup>**

| LiNES subscales                       | Developmental stage |               |              |
|---------------------------------------|---------------------|---------------|--------------|
|                                       | Child x Adol (r)    | Child x Adult | Adol x adult |
| <b><i>Interpersonal Trauma</i></b>    |                     |               |              |
| $r_s$                                 | <b>.884</b>         | <b>.571</b>   | <b>.649</b>  |
| Z                                     | .672                | .308          | .768         |
| Cohen's d                             | -                   | -             | -            |
| <b><i>Negative affect</i></b>         |                     |               |              |
| $r_s$                                 | <b>.833</b>         | <b>.565</b>   | <b>.651</b>  |
| Z                                     | 4.112*              | 5.125*        | 2.989*       |
| Cohen's d                             | 0.3*                | 0.43*         | 0.24*        |
| <b><i>Relationship insecurity</i></b> |                     |               |              |
| $r_s$                                 | <b>.925</b>         | <b>.524</b>   | <b>.634</b>  |
| Z                                     | 5.124*              | 0.534         | 2.176        |
| Cohen's d                             | 0.42*               | -             | -            |

<sup>a</sup> Correlations are shown in bold; all correlations were significant at  $p < .001$  and remained significant after Bonferroni-Holm corrections for multiple comparisons;  $r_s$ =Spearman's correlation coefficient; Z = Wilcoxon signed ranks test. \* indicates t-test significance  $< .01$  (corrected, Bonferroni-Holm) or effect size  $> 0.2$  (small); - indicates where no effect size calculation was carried out due to non-significant t-test.

**Supplementary Table S5B. Control participants - Relationships between childhood, adolescence, and adulthood LiNES scores (n = 170)<sup>a</sup>**

| Description                           | Developmental stage |               |              |
|---------------------------------------|---------------------|---------------|--------------|
|                                       | Child x Adol (r)    | Child x Adult | Adol x adult |
| <b><i>Interpersonal Trauma</i></b>    |                     |               |              |
| $r_s$                                 | <b>.551</b>         | <b>.390</b>   | <b>.435</b>  |
| Z                                     | .502                | .751          | -1.399       |
| Cohen's d                             | -                   | -             | -            |
| <b><i>Negative affect</i></b>         |                     |               |              |
| $r_s$                                 | <b>.561</b>         | <b>.413</b>   | <b>.694</b>  |
| Z                                     | 8.512**             | 7.953**       | .737         |
| Cohen's d                             | 0.46*               | 0.43*         | -            |
| <b><i>Relationship insecurity</i></b> |                     |               |              |
| r                                     | <b>.745</b>         | <b>.570</b>   | <b>.632</b>  |
| Z                                     | 7.133*              | 2.578*        | 3.398*       |
| Cohen's d                             | 0.39*               | 0.13          | 0.18         |

<sup>a</sup> Correlations are shown in bold; all correlations were significant at  $p < .001$  and remained significant after Bonferroni-Holm corrections for multiple comparisons;  $r_s$ =Spearman's correlation coefficient; Z = Wilcoxon signed ranks test. \* indicates t-test significance  $< .01$  (corrected, Bonferroni-Holm) or effect size  $> 0.2$  (small), \*\* indicates t-test significance  $< .001$  (that remained significant after Bonferroni-Holm correction) or effect size  $> 0.5$  (medium); - indicates where no effect size calculation was carried out due to non-significant t-test.

**Supplementary Table S6. Concurrent validity<sup>a</sup>**

|                                |                       | Correlations ( $r_s$ ) |        |        |
|--------------------------------|-----------------------|------------------------|--------|--------|
| LiNES Subscale                 | Validated measure     | Child                  | Adoles | Adult  |
| <b>Interpersonal Trauma</b>    | <b>CATS (n = 70)</b>  |                        |        |        |
|                                | Negative Environment  | .746**                 | .790** | .533** |
|                                | Punishment            | .615**                 | .633** | .516** |
|                                | Sexual Abuse          | .642**                 | .569** | .385** |
|                                | Emotional Abuse       | .636**                 | .681** | .452** |
|                                | Total Score           | .769**                 | .774** | .534** |
| <b>Negative Affect</b>         | <b>PANAS (n = 70)</b> |                        |        |        |
|                                | Negative              | .544**                 | .569** | .575** |
|                                | Positive              | -.242*                 | .257*  | -.292* |
| <b>Relationship Insecurity</b> | <b>RSQ (n= 70)</b>    |                        |        |        |
|                                | Anxious               | .486**                 | .548** | .620** |
|                                | Avoidant              | .063                   | .081   | .019   |

<sup>a</sup> CATS = Childhood Abuse and Trauma Scale; PANAS = Positive and Negative Affect Scale; RSQ = Relationship Scales Questionnaire; Adoles = Adolescence.  $r_s$  = Spearman's rho value. \*\*  $p < .001$ , \* $p < 0.05$  (2-tailed) and remained significant following Bonferroni-Holm correction for multiple comparisons
